# Supplementary material
Source: MDPI journal article supplement (https://www.mdpi.com/2073-4344/9/1/100)
Supplement: s1 [file s1]

## Supplementary Materials

# ***Operando* dual beam FTIR study of hydroxyl groups and Zn species over defective HZSM-5 zeolite supported zinc catalysts**

Long Lin<sup>1</sup>, Xiaotong Zhang<sup>1</sup>, Ning He<sup>1</sup>, Jiaxu Liu<sup>1,\*</sup>, Qin Xin<sup>2</sup>, Hongchen Guo<sup>1</sup>

<sup>1</sup> State Key Laboratory of Fine Chemicals and School of Chemical Engineering, Dalian University of Technology, No. 2 Linggong Road, Dalian 116024, PR China

<sup>2</sup> State Key Laboratory of Catalysis, Dalian Institute of Chemical Physics, Chinese Academy of Sciences, Dalian 116023, PR China

\* Correspondence: liujiaxu@dlut.edu.cn; Tel.: +86-411-8498-6162; Fax: +86-411-8498-6162

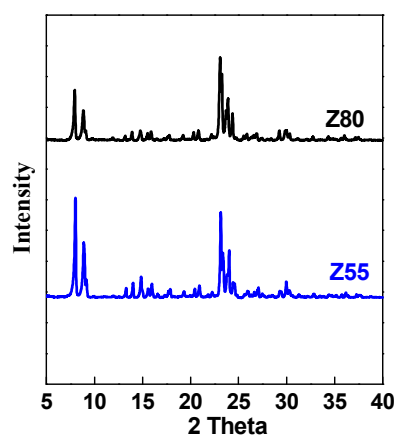

Figure S1. XRD patterns of the commercial ZSM-5 zeolite (CBV8014 coded as Z80) and defective Z55 sample.

Table S1. Textural properties of Z80 and defective Z55 zeolites.

| Samples | SiO <sub>2</sub> /Al <sub>2</sub> O <sub>3</sub> | S <sub>BET</sub><br>(m <sup>2</sup> /g) | S <sub>micro</sub><br>(m <sup>2</sup> /g) | V <sub>total</sub><br>(cm <sup>3</sup> /g) | V <sub>micro</sub><br>(cm <sup>3</sup> /g) | Crystallinity<br>(%) |
|---------|--------------------------------------------------|-----------------------------------------|-------------------------------------------|--------------------------------------------|--------------------------------------------|----------------------|
| Z80     | 80                                               | 405                                     | 332                                       | 0.25                                       | 0.13                                       | 100                  |
| Z55     | 55                                               | 395                                     | 362                                       | 0.20                                       | 0.13                                       | 89.84                |

Note: S<sub>BET</sub>, BET surface area was calculated by the Brunauer-Emmett-Teller (BET) method; V<sub>micro</sub>, micropore volume was determined by t-plot; V<sub>meso</sub>, mesopore volume was determined by V<sub>total</sub>-V<sub>micro</sub>. ZSM-5 zeolite with SiO<sub>2</sub>/Al<sub>2</sub>O<sub>3</sub> ratio of 80 purchased from Zeolyst company (CBV8014) was chosen as reference. The relative crystallinity was estimated by comparing the total XRD peak area of defective ZSM-5 zeolite sample in the range of 2 theta from 22 to 25° with that of the reference ZSM-5.

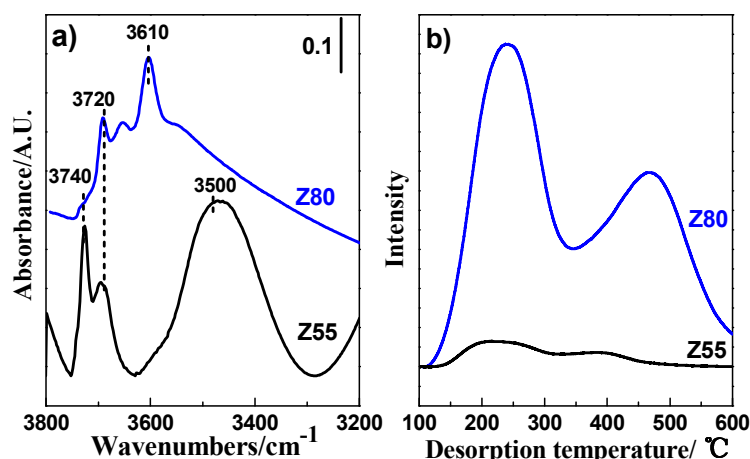

Figure S2. Acidity of Z80 and defective Z55 zeolites. a) FT-IR spectra of hydroxyl groups, b) NH<sub>3</sub>-TPD profile.

The strength and total amount of acid sites over Z80 is considerably larger than defective Z55 zeolite. These differences are possibly caused by the synthesis method of zeolites such as template applied, crystallization time, silicon and aluminum source.

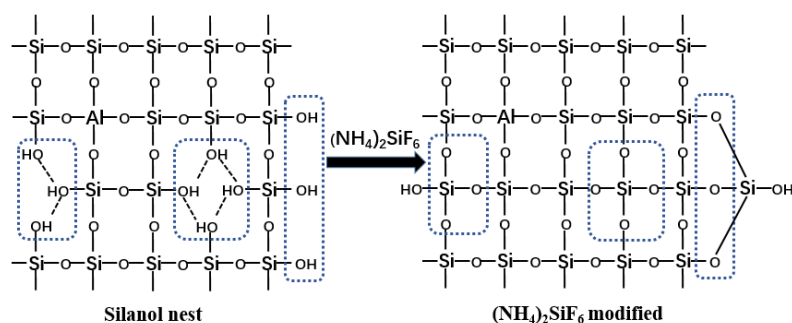

Scheme S1. Schematic diagram for repairing lattice defects of ZSM-5 zeolite by (NH<sub>4</sub>)<sub>2</sub>SiF<sub>6</sub>.

Table S2. Products distribution of *n*-hexane aromatization on Zn/Z950 and Zn/Z950R catalysts in pulse micro-reactor.

| Cat                       | Con. % | S%-C <sub>1</sub> <sup>O</sup> +C <sub>2</sub> <sup>O</sup> | S%-C <sub>2</sub> <sup>=</sup> -C <sub>4</sub> <sup>=</sup> | S%-C <sub>3</sub> <sup>O</sup> +C <sub>4</sub> <sup>O</sup> | S%-C <sub>5</sub> <sup>+</sup> | BTX in C <sub>5</sub> <sup>+</sup> % |
|---------------------------|--------|-------------------------------------------------------------|-------------------------------------------------------------|-------------------------------------------------------------|--------------------------------|--------------------------------------|
| Z950                      | 2.09   | 3.35                                                        | 28.71                                                       | 12.44                                                       | 55.50                          | 21.55                                |
| Zn <sub>0.09</sub> /Z950  | 5.85   | 2.46                                                        | 39.15                                                       | 6.50                                                        | 51.90                          | 34.45                                |
| Zn <sub>0.20</sub> /Z950  | 5.88   | 1.87                                                        | 41.67                                                       | 6.29                                                        | 50.17                          | 46.10                                |
| Zn <sub>0.51</sub> /Z950  | 8.48   | 0.71                                                        | 39.03                                                       | 7.31                                                        | 52.95                          | 58.80                                |
| Z950R                     | 2.64   | 3.41                                                        | 24.62                                                       | 17.88                                                       | 54.09                          | 17.51                                |
| Zn <sub>0.10</sub> /Z950  | 6.19   | 3.72                                                        | 31.02                                                       | 14.38                                                       | 50.89                          | 20.00                                |
| Zn <sub>0.20</sub> /Z950R | 5.78   | 2.94                                                        | 32.35                                                       | 14.36                                                       | 50.35                          | 28.52                                |
| Zn <sub>0.50</sub> /Z950R | 7.89   | 2.41                                                        | 34.98                                                       | 10.65                                                       | 51.96                          | 26.34                                |

Reaction conditions: T = 600 °C (Zn/Z950) and 500 °C (Zn/Z950R), P = 101.33 kPa.

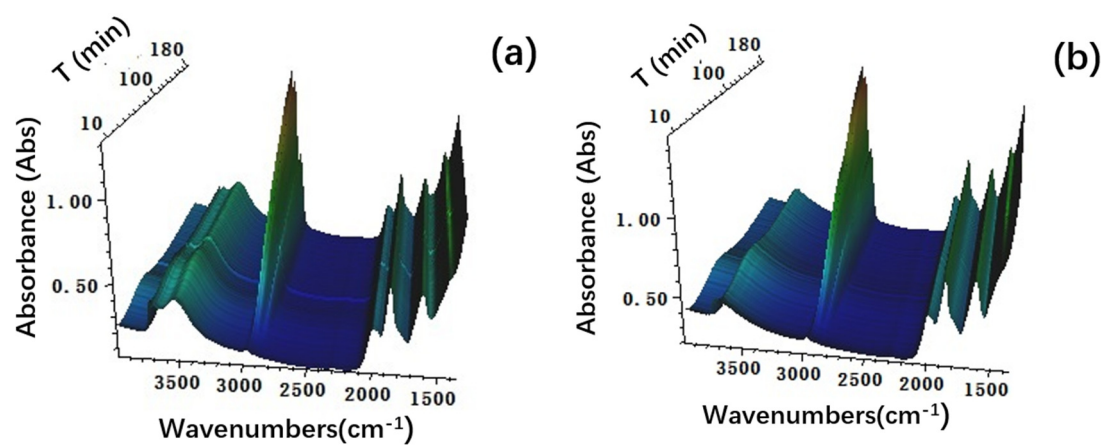

Figure S3. The overall three-dimensional FTIR profiles of *n*-hexane aromatization on Zn/Z950 (a) and Zn/Z950R (b) catalysts in 180 min. Reaction conditions:  $T = 300\text{ }^{\circ}\text{C}$ ,  $P = 101.33\text{ kPa}$ , *n*-hexane was carried into IR-cell reactor by  $\text{N}_2$  (10mL/min), GHSV =  $220\text{ h}^{-1}$ .
